# Supplementary material for: Spatial multi-omics of human skin reveals KRAS and inflammatory responses to spaceflight
Source: PubMed Central journal article supplement (PMC11166909; doi:10.1038/s41467-024-48625-2), 2024-06-11
Supplement: 41467_2024_48625_MOESM3_ESM.pdf [file 41467_2024_48625_MOESM3_ESM.pdf]

## **DESCRIPTION OF ADDITIONAL SUPPLEMENTARY FILES**

**Supplementary Data 1.** Differential expression analysis results and statistics

**Supplementary Data 2.** Gene set enrichment analysis results and statistics

**Supplementary Data 3.** Relative abundances of bacterial and viral species from skin swab metagenomics and metatranscriptomics analysis and LASSO association analysis results
